# Supplementary material for: Depletion of neurocan in the prefrontal cortex impairs temporal order recognition, cognitive flexibility and perisomatic GABAergic innervation
Source: Research Square preprint supplement (doi:10.21203/rs.3.rs-8502638/v1), 2026-02-10
Supplement: Supplementary file 1 [file 72cc6a5f9f3db20de247a98b.xlsx]

## Sheet: Full 1
Measure	Outliers excluded (ROUT Q=1%)	Normality (Shapiro-Wilk)		Homocedasticity (F-test)	Statistical Test Applied	Main Test Statistic & p-value
		WT	KO
WFA Fluorescence Intensity (FI)	WT: 0, Ncan KO: 1	W = 0.966, p = 0.8533	W = 0.8573, p = 0.2188	F_{5,4} = 1.134, p = 0.9282	Independent t-test	t_{8} = 3,309, p = 0.0107*
VGAT Puncta on PV cells	WT: 0, Ncan KO: 0	W = 0.853, p = 0.2059	W = 0.7741, p = 0.0339*	F_{5,4} = 1.134, p = 0.9283	Mann-Whitney	U = 14, p = 0.9307
VGAT FI on PV cells	WT: 0, Ncan KO: 0	W = 0.839, p = 0.1621	W = 0.9452, p = 0.7009	F_{5,4} = 1.134, p = 0.9284	Independent t-test	t_{9} = 0.3248, p = 0.7528
VGAT Puncta on CAMKII cells	WT: 0, Ncan KO: 0	W = 0.921, p = 0.5387	W = 0.9571, p = 0.7970	F_{5,4} = 1.134, p = 0.9285	Independent t-test	t_{9} =1.364, p = 0.2058
VGAT FI on CAMKII cells	WT: 0, Ncan KO: 0	W = 0.921, p = 0.5373	W = 0.8624, p = 0.1974	F_{5,4} = 1.134, p = 0.9286	Independent t-test	t_{9} = 0.2172, p = 0.8329
PV Puncta on CAMKII cells	WT: 0, Ncan KO: 0	W = 0.847, p = 0.1869	W = 0.8402, p = 0.1309	F_{5,4} = 1.134, p = 0.9287	Independent t-test	t_{9} = 0.5068, p = 0.6244
PV FI on CAMKII cells	WT: 0, Ncan KO: 0	W = 0.921, p = 0.5391	W = 0.992, p = 0.9938	F_{5,4} = 1.134, p = 0.9288	Independent t-test	t_{9} = 1.333, p = 0.2154
CAMKII cells FI	WT: 0, Ncan KO: 0	W = 0.869, p = 0.2643	W = 0.8644, p = 0.2048	F_{5,4} = 1.134, p = 0.9289	Independent t-test	t_{9} = 0.7340, p = 0.4816
PSD95 puncta density	WT: 0, Ncan KO: 0	W = 0.937, p = 0.6442	W = 0.8561, p = 0.1763	F_{5,4} = 1.134, p = 0.9290	Independent t-test	t_{9} = 0.0984, p = 0.9238
PSD95 FI	WT: 0, Ncan KO: 0	W = 0.895, p = 0.3820	W = 0.9237, p = 0.5324	F_{5,4} = 1.134, p = 0.9291	Independent t-test	t_{9} = 0.2224, p = 0.8290
VGLUT1 puncta density	WT: 0, Ncan KO: 0	W = 0.965, p = 0.8426	W = 0.9923, p = 0.9941	F_{5,4} = 1.134, p = 0.9292	Independent t-test	t_{9} = 0.6062, p = 0.5593
VGLUT1 FI	WT: 0, Ncan KO: 0	W = 0.848, p = 0.1869	W = 0.981, p = 0.9555	F_{5,4} = 1.134, p = 0.9293	Independent t-test	t_{9} = 0.3582, p = 0.7284
