# Supplementary material for: Depletion of neurocan in the prefrontal cortex impairs temporal order recognition, cognitive flexibility and perisomatic GABAergic innervation
Source: Research Square preprint supplement (doi:10.21203/rs.3.rs-8502638/v1), 2026-02-10
Supplement: Supplementary file 2 [file b46008e5c76e1ae2a0110f10.xlsx]

## Sheet: Ncan shRNA
Figure	Measure	Outliers excluded (ROUT Q=1%)	Normality (Shapiro-Wilk)		Homocedasticity (F-test)	Statistical Test Applied	Main Test Statistic & p-value
			Control_shRNA	Ncan_shRNA
1C	NCAN Fluorescence Intensity (FI)	Control_shRNA: 0, Ncan shRNA: 1	W = 0.9720, p = 0.9125	W = 0.9602, p = 0.8119	F_{7,6} = 2.261, p = 0.3396	Unpaired t test with Welch's correction	t_{12} = 3.464, p = 0.0046**
1C	WFA Fluorescence Intensity (FI)	Control_shRNA: 0, Ncan shRNA: 1	W = 0.9234, p = 0.4961	W = 0.9754, p = 0.9365	F_{6,7} = 1.094, p = 0.8962	Unpaired t test with Welch's correction	t_{12} = 2.735, p = 0.0175*
2B	Time in Peripheral area (8weeks)	Control_shRNA: 0, Ncan shRNA: 0	W = 0.9505, p = 0.6745	W = 0.8783, p = 0.1507	F_{9,8} = 1.819, p = 0.9285	Unpaired t test with Welch's correction	t_{14} =1.884, p = 0.0796
2B	Time in central area (8weeks)	Control_shRNA: 0, Ncan shRNA: 0	W = 0.9501, p = 0.6695	W = 0.8859, p = 0.1810	F_{9,8} = 1.865, p = 0.3718	Unpaired t test with Welch's correction	t_{14} = 1.918, p = 0.0749
2B	Ratio of time in central/peripheral area (8weeks)	Control_shRNA: 0, Ncan shRNA: 0	W = 0.9432, p = 0.5887	W = 0.8691, p = 0.1204	F_{9,8} = 2.393, p = 0.2156	Unpaired t test with Welch's correction	t_{14} = 1.912, p = 0.0774
2B	Distance travelled (8weeks)	Control_shRNA: 0, Ncan shRNA: 0	W = 0.9877, p = 0.9931	W = 0.9353, p = 0.5336	F_{9,8} = 3.112, p = 0.1246	Unpaired t test with Welch's correction	t_{14} = 0.7042, p = 0.4925
2C	Exploration time (8 weeks)	Control_shRNA: 0, Ncan shRNA: 1	(F,N) W = 0.9195;0.9591, p = 0.3530;0.7753	W = 0.9666,0.9422, p = 0.8640,0.6052		Wilcoxon matched Paired t test	[Control, shRNA] t_{9,8} = 2.308, 3.893; p = 0.0464*, 0.0046**
2C	Discrimination ratio (8 weeks)	Control_shRNA: 0, Ncan shRNA: 0	W = 0.9537, p = 0.7118	W = 0.9684, p = 0.8810	F_{9,8} = 1.526, p = 0.5628	Unpaired t test with Welch's correction	t_{16} =1.065, p = 0.3020
2D	Time in Peripheral area (16weeks)	Control_shRNA: 0, Ncan shRNA: 0	W = 0.8666, p = 0.1396	W = 0.9130, p = 0.3376	F_{7,8} = 4.527, p = 0.0500	Unpaired t test with Welch's correction	t_{10} =0.6997, p = 0.5006
2D	Time in central area (16weeks)	Control_shRNA: 0, Ncan shRNA: 0	W = 0.8684, p = 0.1453	W = 0.9115, p = 0.3266	F_{7,8} = 4.321, p = 0.3718	Unpaired t test with Welch's correction	t_{10} = 0.6602, p = 0.5243
2D	Ratio of time in central/peripheral area (16weeks)	Control_shRNA: 0, Ncan shRNA: 0	W = 0.8060, p = 0.0332*	W = 0.9284, p = 0.4664	F_{7,8} = 5.346, p = 0.0310*	Unpaired t test	t_{15} = 0.4977, p = 0.6259
2D	Distance travelled (16 weeks)	Control_shRNA: 0, Ncan shRNA: 0	W = 0.8818, p = 0.1961	W = 0.9054, p = 0.2853	F_{7,8} = 1.015, p = 0.9716	Unpaired t test with Welch's correction	t_{15} = 0.5813, p = 0.5698
2E	Exploration time (16 weeks)	Control_shRNA: 2, Ncan shRNA: 2	(F,N) W = 0.8691;0.9432, p = 0.1476;0.6424	W = 0.9688,0.9346, p = 0.8847,0.5268		Wilcoxon matched Paired t test	[Control, shRNA] t_{7,8} = 4.162, 0.3681; p = 0.0042**, 0.7224
2E	Discrimination ratio (16 weeks)	Control_shRNA: 2, Ncan shRNA: 0	W = 0.9729, p = 0.9199	W = 0.9528, p = 0.7210	F_{8,7} = 3.537, p = 0.1133	Unpaired t test with Welch's correction	t_{12} =2.632, p = 0.0213*
3C	Distance travelled (labyrinth)	Control_shRNA: 2, Ncan shRNA: 0			[Tme; Group; Time*Group] F_{6.215,93.23; 1,15; 6.215,93.23} = 11.12; 1.776; 0.7820, p = <0.0001; 0.2025; 0.5902	two-way RM ANOVA; two-way ANOVA with Fisher’s LSD
3D	Errors made (labyrinth)	Control_shRNA: 2, Ncan shRNA: 0			[Tme; Group; Time*Group] F_{20,300; 1,15; 20,300} = 13.94; 1.165; 0.7911, p = <0.0001; 0.2974; 0.7243	two-way RM ANOVA; two-way ANOVA with Fisher’s LSD
3D	Retrieval Index (labyrinth-learning)	Control_shRNA: 2, Ncan shRNA: 0	W = 0.9356, p = 0.5682	W = 0.8551, p = 0.0848	F_{8,7} = 2.702, p = 0.2079	Unpaired t test with Welch's correction	t_{13} = 0.2132, p = 0.8344
3D	Retrieval Index (labyrinth-1st Relearning)	Control_shRNA: 2, Ncan shRNA: 0	W = 0.9469, p = 0.6805	W = 0.9411, p = 0.5936	F_{8,7} = 1.629, p = 0.5340	Unpaired t test with Welch's correction	t_{15} = 1.333, p = 0.2026
3D	Retrieval Index (labyrinth-2nd Relearning)	Control_shRNA: 2, Ncan shRNA: 0	W = 0.9016, p = 0.2985	W = 0.9454, p = 0.6395	F_{8,7} = 3.326, p = 0.1309	Unpaired t test with Welch's correction	t_{13} = 2.049, p = 0.0617
3E	Entries into the blocked path (labyrinth)	Control_shRNA: 2, Ncan shRNA: 0			[Tme; Group; Time*Group] F_{13,117; 1,9; 13,75} = 20.73; 0.8516; 0.8986, p = <0.0001; 0.3802; 0.5581	two-way RM ANOVA; two-way ANOVA with Fisher’s LSD
3E	Accuracy Index (labyrinth-1st Relearning-Zone1)	Control_shRNA: 2, Ncan shRNA: 0	W = 0.6412, p = 0.0005***	W = 0.8126, p = 0.0284*		Mann Whitney test	Mann-Whitney U_sum of ranks{90.50, 62.50} = 17.50, p = 0.0294*
3E	Retrieval Index (labyrinth-2nd Relearning-Zones 1&2)	Control_shRNA: 2, Ncan shRNA: 0	W = 0.9795, p = 0.9602	W = 0.9436, p = 0.6204	F_{8,7} = 1.360, p = 0.6982	Unpaired t test with Welch's correction	t_{15} = 1.970, p = 0.0676
4B	vGAT Fluorescence Intensity (FI)_perisomatic	Control_shRNA: 1, Ncan shRNA: 0	(PV-;PV+) W = 0.8423;0.9207, p = 0.1043;0.4745	(PV-;PV+) W = 0.9266;0.9537, p = 0.4497;0.7304	(PV-;PV+) F_{8,6; 8,6} = 1.353;1.423, p = 0.6737;0.6864	Unpaired t test with Welch's correction	(PV-;PV+) t_{12;14} = 1.869; 2.820, p = 0.0863; 0.0137*
4B	vGAT number_perisomatic	Control_shRNA: 1, Ncan shRNA: 0	(PV-;PV+) W = 0.8560;0.9340, p = 0.1394;0.5851	(PV-;PV+) W = 0.8998;0.9202, p = 0.2510;0.3936	(PV-;PV+) F_{8,6; 8,6} = 2.838;1.793, p = 0.1743;0.4357	Unpaired t test with Welch's correction	(PV-;PV+) t_{9;11} = 1.665; 2.091, p = 0.1295; 0.0609
4C	PV Fluorescence Intensity (FI)_perisomatic	Control_shRNA: 1, Ncan shRNA: 0	(PV-;PV+) W = 0.9611;0.8996, p = 0.8282;0.3288	(PV-;PV+) W = 0.8949;0.9541, p = 0.2241;0.7354	(PV-;PV+) F_{8,6; 8,6} = 2.036;2.027, p = 0.3467;0.4047	Unpaired t test with Welch's correction	(PV-;PV+) t_{10;14} = 3.846; 3.314, p = 0.0030**; 0.0052**
4C	PV number_perisomatic	Control_shRNA: 1, Ncan shRNA: 0	(PV-;PV+) W = 0.8964;0.9428, p = 0.3100;0.6640	(PV-;PV+) W = 0.8354;0.8644, p = 0.0513;0.1069	(PV-;PV+) F_{8,6; 8,6} = 1.392;1.595, p = 0.6477;0.5281	Unpaired t test with Welch's correction	(PV-;PV+) t_{12;11} = 4.913; 2.716, p = 0.0004***; 0.0197*
4E	vGAT Fluorescence Intensity (FI)_perisomatic-CamKII	Control_shRNA: 2, Ncan shRNA: 0	W = 0.8988, p = 0.3240	W = 0.9431, p = 0.6146	F_{6,8} = 1.330, p = 0.7487	Unpaired t test with Welch's correction	t_{14} = 1.017, p = 0.3268
4E	vGAT number_perisomatic-CamKII	Control_shRNA: 2, Ncan shRNA: 0	W = 0.8295, p = 0.0792	W = 0.7830, p = 0.0130*		Mann Whitney test	Mann-Whitney U_sum of ranks{74, 62} = 17, p = 0.1359
4F	PV Fluorescence Intensity (FI)_perisomatic-CamKII	Control_shRNA: 2, Ncan shRNA: 0	W = 0.8576, p = 0.1439	W = 0.9385, p = 0.5658	F_{6,8} = 3.211, p = 0.1307	Unpaired t test with Welch's correction	t_{9} = 3.587, p = 0.0060**
4F	PV number_perisomatic-CamKII	Control_shRNA: 2, Ncan shRNA: 0	W = 0.9131, p = 0.4176	W = 0.9569, p = 0.7652	F_{6,8} = 2.216, p = 0.2946	Unpaired t test with Welch's correction	t_{10} = 3.779, p = 0.0036**
4G	CamKII Fluorescence Intensity (FI)	Control_shRNA: 2, Ncan shRNA: 0	W = 0.9042, p = 0.3571	W = 0.9308, p = 0.4892	F_{6,8} = 1.180, p = 0.8055	Unpaired t test with Welch's correction	t_{12} = 1.233, p = 0.2404
5B	vGAT Fluorescence Intensity (FI)_Neuropil	Control_shRNA: 2, Ncan shRNA: 0	W = 0.8242, p = 0.0704	W = 0.9091, p = 0.3093	F_{6,8} = 2.660, p = 0.2014	Unpaired t test with Welch's correction	t_{10} = 1.358, p = 0.2062
5B	vGAT number_Neuropil	Control_shRNA: 2, Ncan shRNA: 0	W = 0.8519, p = 0.1280	W = 0.9035, p = 0.2728	F_{8,6} = 1.171, p = 0.8717	Unpaired t test with Welch's correction	t_{14} = 0.1371, p = 0.8930
5C	PV Fluorescence Intensity (FI)_Neuropil	Control_shRNA: 2, Ncan shRNA: 0	W = 0.8672, p = 0.1755	W = 0.9499, p = 0.6895	F_{6,8} = 3.047, p = 0.1480	Unpaired t test with Welch's correction	t_{9} = 3.623, p = 0.0055**
5C	PV number_Neuropil	Control_shRNA: 2, Ncan shRNA: 0	W = 0.9659, p = 0.8675	W = 0.9730, p = 0.9194	F_{6,8} = 1.672, p = 0.4896	Unpaired t test with Welch's correction	t_{11} = 3.523, p = 0.0047**
5E	PSD95 Fluorescence Intensity (FI)_Neuropil	Control_shRNA: 1, Ncan shRNA: 1	W = 0.9655, p = 0.8639	W = 0.9265, p = 0.5216	F_{6,6} = 4.868, p = 0.0754	Unpaired t test with Welch's correction	t_{8} = 0.01050, p = 0.9919
5E	PSD95 number_Neuropil	Control_shRNA: 2, Ncan shRNA: 1	W = 0.7820, p = 0.0270*	W = 0.9707, p = 0.9034		Mann Whitney test	Mann-Whitney U_sum of ranks{41, 64} = 13, p = 0.1649
5F	vGLUT1 Fluorescence Intensity (FI)_Neuropil	Control_shRNA: 2, Ncan shRNA: 1	W = 0.9160, p = 0.4387	W = 0.9551, p = 0.7757	F_{6,6} = 2.078, p = 0.3952	Unpaired t test with Welch's correction	t_{11} = 2.460, p = 0.0322*
5F	vGLUT1 number_Neuropil	Control_shRNA: 2, Ncan shRNA: 1	W = 0.9770, p = 0.9435	W = 0.9522, p = 0.7493	F_{6,6} = 2.564, p = 0.2768	Unpaired t test with Welch's correction	t_{12} = 2.209, p = 0.0474*
5H	vGLUT2 Fluorescence Intensity (FI)_Neuropil	Control_shRNA: 2, Ncan shRNA: 1	W = 0.9000, p = 0.3311	W = 0.9618, p = 0.8165	F_{8,6} = 1.276, p = 0.7883	Unpaired t test with Welch's correction	t_{14} = 0.2774, p = 0.7856
5H	vGLUT2 number_Neuropil	Control_shRNA: 2, Ncan shRNA: 1	W = 0.9305, p = 0.5550	W = 0.8684, p = 0.1182	F_{8,6} = 1.324, p = 0.7532	Unpaired t test with Welch's correction	t_{14} = 0.1060, p = 0.9171
	Measure	Outliers excluded (ROUT Q=1%)	Correlation			Number of data points	Statistical Test Applied
			Sperman r	R squared	P-value
1D	NCAN Intensity/WFA Intensity(Control)	NCAN: 1 ; WFA:1	-0.03378	0.7751	0.7751	74	Sperman Correlation
1D	NCAN Intensity/WFA Intensity(Ncan_shRNA)	NCAN: 2 ; WFA:2	0.5214	0.2718	<0.0001****	83	Sperman Correlation
